# Supplementary material for: Variation in Ribosomal DNA in the Genus Trifolium (Fabaceae)
Source: MDPI journal article supplement (doi:10.3390/plants10091771), 2021-08-25
Supplement: s1 [file s1]

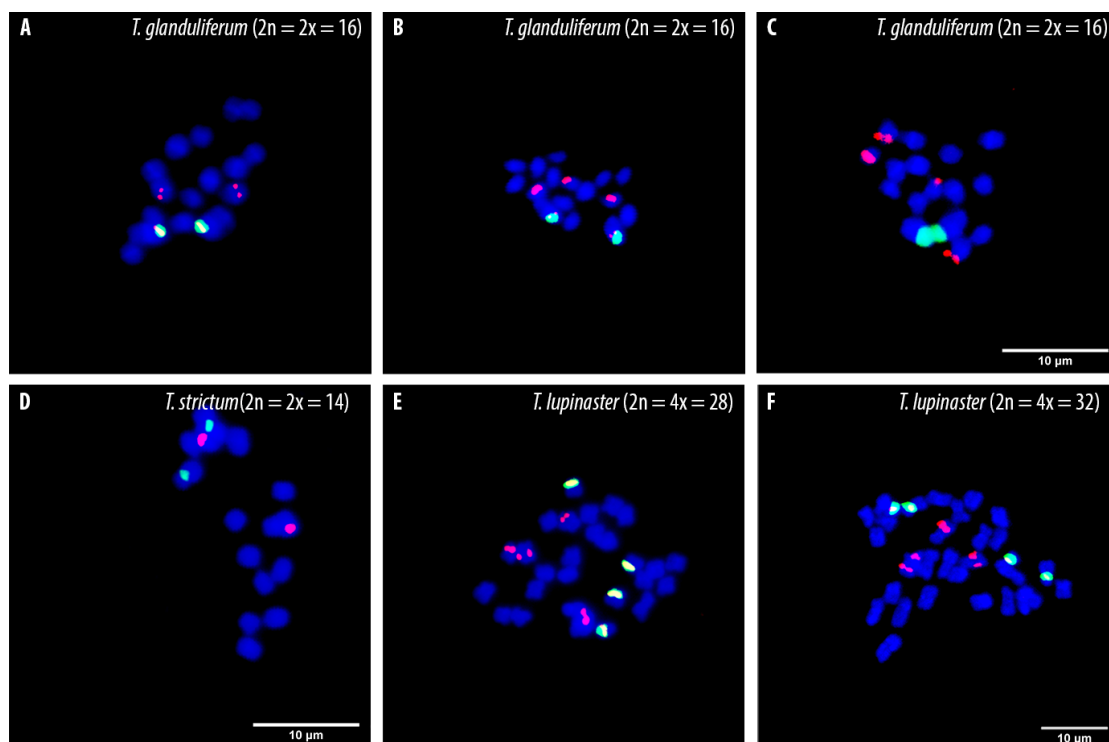

**Figure S6.** Hybridization patterns of 5S and 26S rDNA FISH probes in sections *Paramesus* (A–D) and *Lupinaster* (E,F). .
