# Supplementary material for: Variation in Ribosomal DNA in the Genus Trifolium (Fabaceae)
Source: MDPI journal article supplement (doi:10.3390/plants10091771), 2021-08-25
Supplement: s1 [file s1]

**Table S1.** 5S and 26S rDNA loci numbers and chromosomal positions in 42 *Trifolium* species belonging to subgenus *Chronosemium* and subgenus *Trifolium* (7 sections).

| Subgenus/Section                                    | Trifolium species             | 2n                                                 | Loci number per 2n |        | Position |         |
|-----------------------------------------------------|-------------------------------|----------------------------------------------------|--------------------|--------|----------|---------|
|                                                     |                               |                                                    | 5S                 | 26S    |          |         |
| Chronosemium                                        |                               |                                                    |                    |        |          |         |
|                                                     | T. aureum <sup>a</sup> ▪      | 2x=16                                              | 4                  | 2      | AS OCP   |         |
|                                                     |                               | 2x=14                                              | 4                  | 2      | AS OCP   |         |
|                                                     | T. badium <sup>a</sup> ▪      | 2x=14                                              | 2                  | 4      | S        |         |
|                                                     |                               |                                                    |                    | 2      | 2        | S       |
|                                                     | T. campestre <sup>a</sup> ▪   | 2x=14                                              | 2                  | 2      | S        |         |
|                                                     | T. micranthum <sup>a</sup> ▪  | 2x=16                                              | 2                  | 2      | S        |         |
|                                                     | T. dubium <sup>a</sup> ▪      | 4x=30                                              | 4                  | 4      | S        |         |
|                                                     |                               |                                                    |                    |        |          |         |
| Trifolium                                           |                               |                                                    |                    |        |          |         |
| Trifolium                                           | T. alpestre <sup>a</sup> ▪    | 2x=16                                              | 10                 | 2      | CBS1 AS  |         |
|                                                     |                               |                                                    | 11                 | 2      | CBS1 AS  |         |
|                                                     | T. arvense <sup>a</sup> ▪     | 2x=14                                              | 2                  | 2      | S        |         |
|                                                     | T. bocconeii <sup>a</sup> ▪   | 2x=12                                              | 2                  | 2      | S        |         |
|                                                     | T. cherleri <sup>a</sup> ▪    | 2x=10                                              | 4                  | 10     | CBS1 AS  |         |
|                                                     | T. diffusum <sup>a</sup> ▪    | 2x=16                                              | 2                  | 2      | S        |         |
|                                                     | T. hirtum <sup>a</sup> ▪      | 2x=10                                              | 6                  | 2      | AS OCP   |         |
|                                                     |                               |                                                    |                    |        |          |         |
|                                                     | T. ligusticum <sup>a</sup> ▪  | 2x=12                                              | 2                  | 2      | S        |         |
|                                                     |                               | 2x=14                                              | 2                  | 2      | S        |         |
|                                                     | T. pallidum <sup>a</sup> ▪    | 2x=16                                              | 4                  | 2      | CBS1 AS  |         |
|                                                     | T. purpureum <sup>a</sup> ▪   | 2x=14                                              | 2                  | 2      | S        |         |
|                                                     | T. rubens <sup>a</sup> ▪      | 2x=16                                              | 4                  | 2      | S        |         |
|                                                     | T. squamosum <sup>a</sup> ▪   | 2x=16                                              | 4                  | 2      | S        |         |
|                                                     | T. stellatum <sup>a</sup> ▪   | 2x=12                                              | 4                  | 2      | S        |         |
|                                                     |                               | 2x=14*                                             | 4 (2w)             | 2      | S        |         |
|                                                     | T. pannonicum <sup>a</sup> ▪  | 16x=128                                            | 16                 | 16     | S        |         |
|                                                     |                               | T. pratense <sup>b</sup> ▪                         | 4x=28              | 8      | 8        | CBS2 AS |
|                                                     |                               | T. medium <sup>b</sup> ▪                           | 8x=64              | 12     | 8        | S       |
|                                                     | Trichocephalum                | T. subterraneum subsp. subterraneum <sup>a</sup> ▪ | 2x=16              | 2      | 4 (2w)   | S       |
| T. subterraneum subsp. subterraneum <sup>c</sup> ▪  |                               | 2x=16                                              | 2                  | 2      | S        |         |
| T. subterraneum subsp. brachycalycinum <sup>c</sup> |                               | 2x=16                                              | 2                  | 4 (2w) | S        |         |
| T. israeliticum <sup>c</sup> ▪                      |                               | 2x=12                                              | 10                 | 4      | CBS2 AS  |         |
|                                                     |                               |                                                    |                    |        |          |         |
| Vesicastrum                                         | T. fragiferum <sup>a</sup> ▪  | 2x=16                                              | 2                  | 2      | AS OCP   |         |
|                                                     |                               | 2x=16                                              | 2                  | 2      | AS OCP   |         |
|                                                     | T. resupinatum <sup>a</sup> ▪ | 2x=14                                              | 2                  | 2      | AS OCP   |         |
|                                                     |                               |                                                    | 2                  | 2      | S        |         |
|                                                     | T. spumosum <sup>a</sup> ▪    | 2x=16                                              | 4                  | 2      | CBS1 AS  |         |
| Trifoliastrum                                       | T. glomeratum <sup>a</sup> ▪  | 2x=16                                              | 2                  | 2      | S        |         |
|                                                     | T. montanum <sup>a</sup> ▪    | 2x=16                                              | 2                  | 2      | S        |         |

|               |                                                                 |        |        |    |         |
|---------------|-----------------------------------------------------------------|--------|--------|----|---------|
|               | <i>T. occidentale</i> <sup>d</sup> ▪                            | 2x=16  | 4      | 2  | CBS1 AS |
|               | <i>T. pallescens</i> ▪                                          | 2x=16  | 2      | 2  | AS OCP  |
|               | <i>T. thalii</i> ▪                                              | 2x=16  | 2      | 2  | S       |
|               | <i>T. repens</i> <sup>d</sup> ▪                                 | 4x=32  | 4      | 2  | CBS1 AS |
|               | <i>T. uniflorum</i> <sup>d</sup> ▪                              | 4x=32  | 4      | 4  | CBS2    |
|               | <i>T. nigrescens</i> subsp.<br><i>nigrescens</i> <sup>d</sup>   | 2x=16  | 2      | 2  | CBS1    |
|               | <i>T. nigrescens</i> subsp.<br><i>petrisavii</i> <sup>d</sup> ▪ | 2x=16  | 2      | 2  | S       |
|               | <i>T. ambiguum</i> <sup>d</sup> ▪                               | 2x=16  | 2      | 2  | S       |
|               | <i>T. hybridum</i> <sup>d</sup> ▪                               | 2x=16  | 2      | 2  | CBS1    |
|               | <i>T. isthmocarpum</i> <sup>d</sup> ▪                           | 2x=16  | 2      | 6  | CBS1 AS |
| Involucrarium | <i>T. chilense</i> ▪                                            | 2x=16  | 4      | 2  | CBS1 AS |
|               | <i>T. microdon</i> ▪                                            | 2x=16  | 2      | 2  | CBS1    |
|               | <i>T. microcephalum</i> ▪                                       | 2x=16  | 16     | 16 | CBS8    |
|               |                                                                 |        | 16     | 2  | CBS1 AS |
| Paramesus     |                                                                 |        | 4      | 2  | CBS1 AS |
|               | <i>T. glanduliferum</i> ▪                                       | 2x=16  | 5 (1w) | 2  | CBS1 AS |
|               |                                                                 |        | 4      | 2  | S       |
|               | <i>T. strictum</i> ▪                                            | 2x=14  | 2      | 2  | S       |
| Lupinaster    | <i>T. lupinaster</i> ▪*                                         | 4x=28* | 8      | 4  | CBS2 AS |
|               |                                                                 | 4x=32  | 8      | 4  | CBS2 AS |

\* Newly described chromosome number. Published in <sup>a</sup>Ansari et al. [33], <sup>b</sup>Dluhošová et al. [37], <sup>c</sup>Falisticco et al. [13], <sup>d</sup>Ansari et al. [36]. w – weaker signals than the others; S – signals on separate chromosomes; AS OCP – all signals on one chromosome pair; CBSn AS – co-localization of both signals on n-chromosome pairs, another on separate chromosomes; CBSn – co-localization of both signals on n-chromosome pairs. ▪ indicates sequences used in the tree (Figure S7), with *A. thaliana* used as an outgroup.
