# Supplementary figures and images for: Variation in Ribosomal DNA in the Genus Trifolium (Fabaceae)
Source: MDPI journal article supplement (doi:10.3390/plants10091771), 2021-08-25

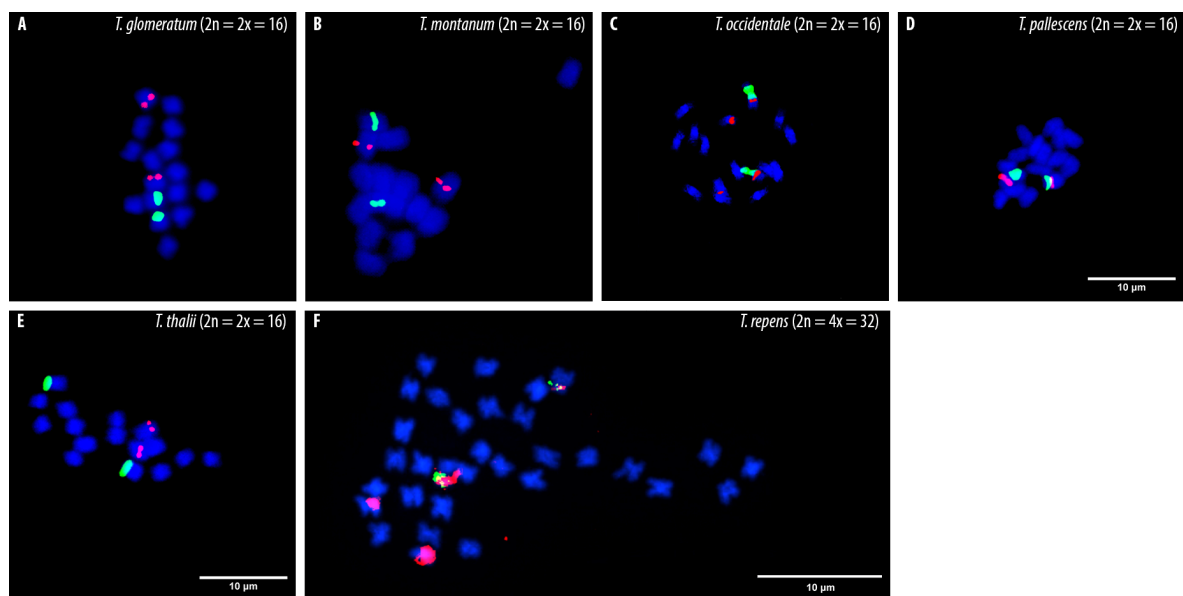

**Figure S4.** Hybridization patterns of 5S and 26S rDNA FISH probes in section *Trifoliastrum*.

Supplement: s1 [file s1]

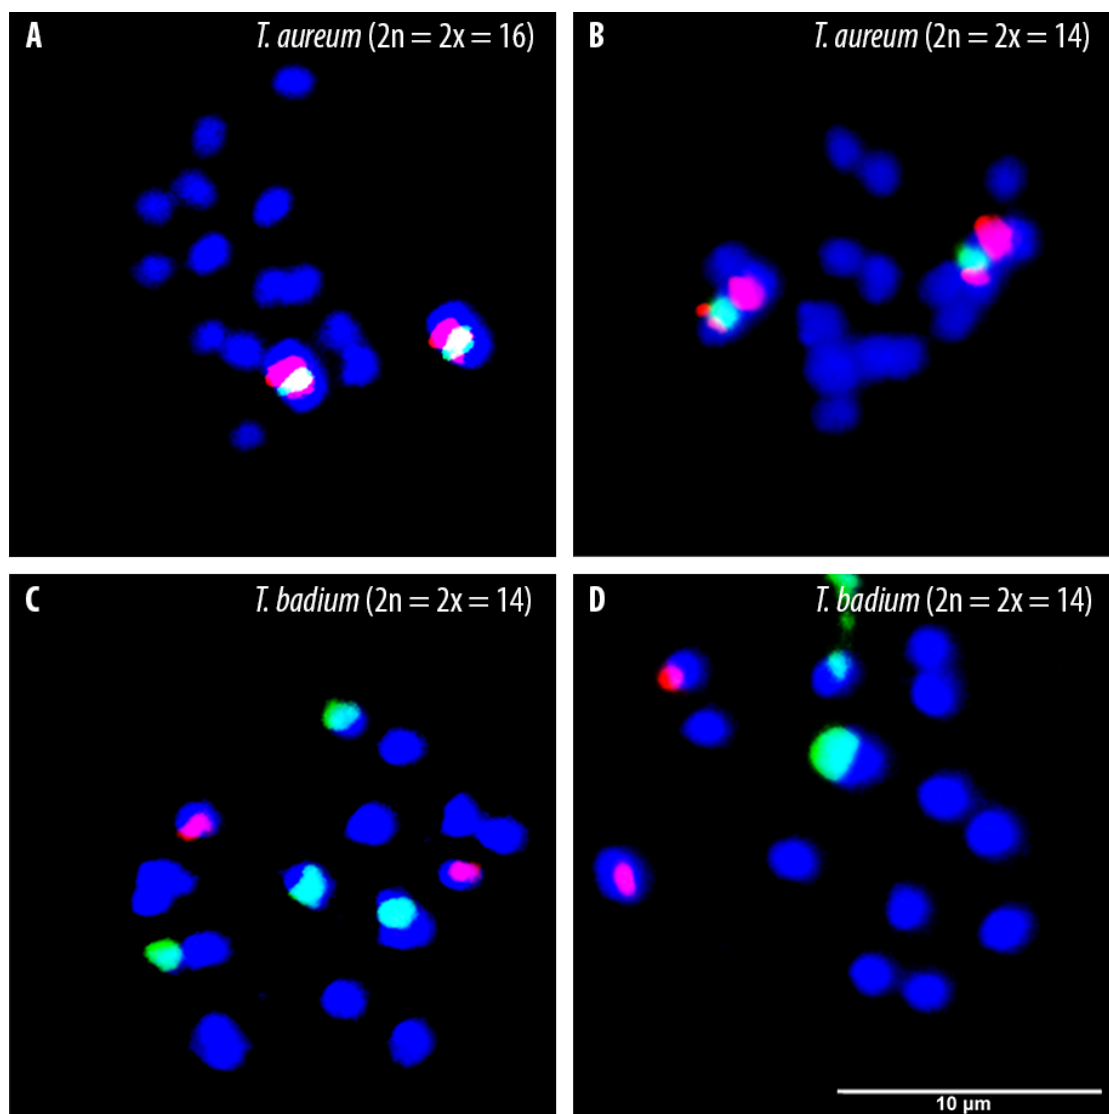

**Figure S1.** Hybridization patterns of 5S and 26S rDNA FISH probes in subgenus *Chronosemium*.

Supplement: s1 [file s1]

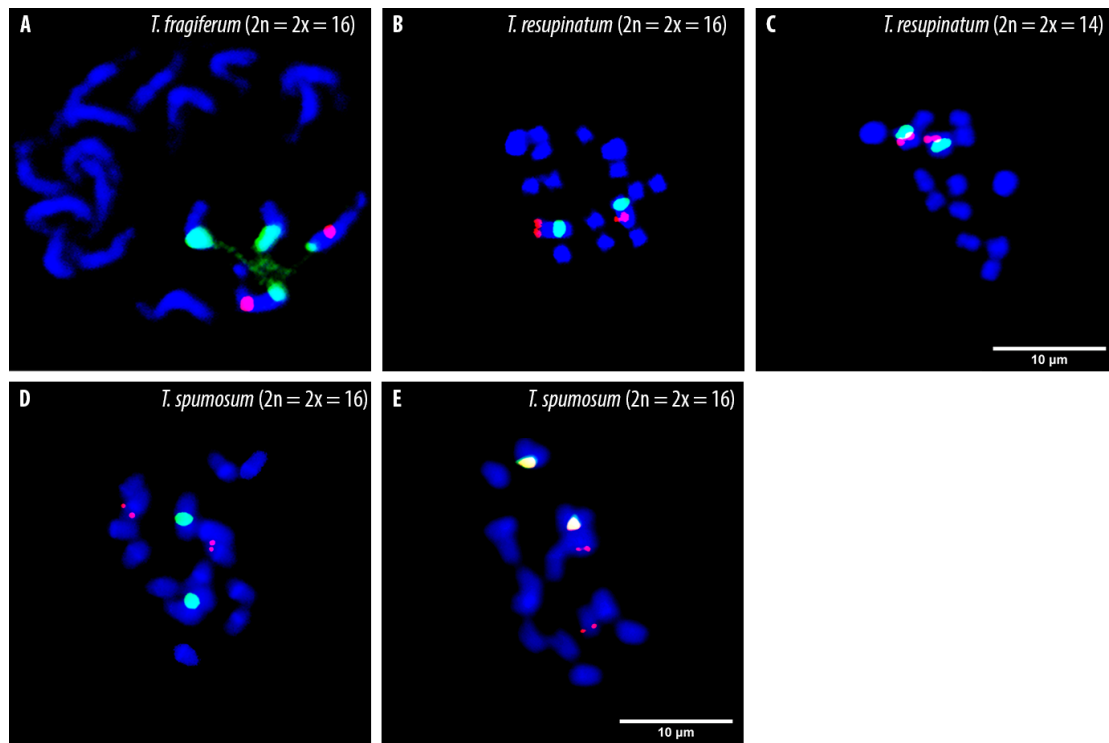

**Figure S3.** Hybridization patterns of 5S and 26S rDNA FISH probes in section *Vesicastrum*.

Supplement: s1 [file s1]

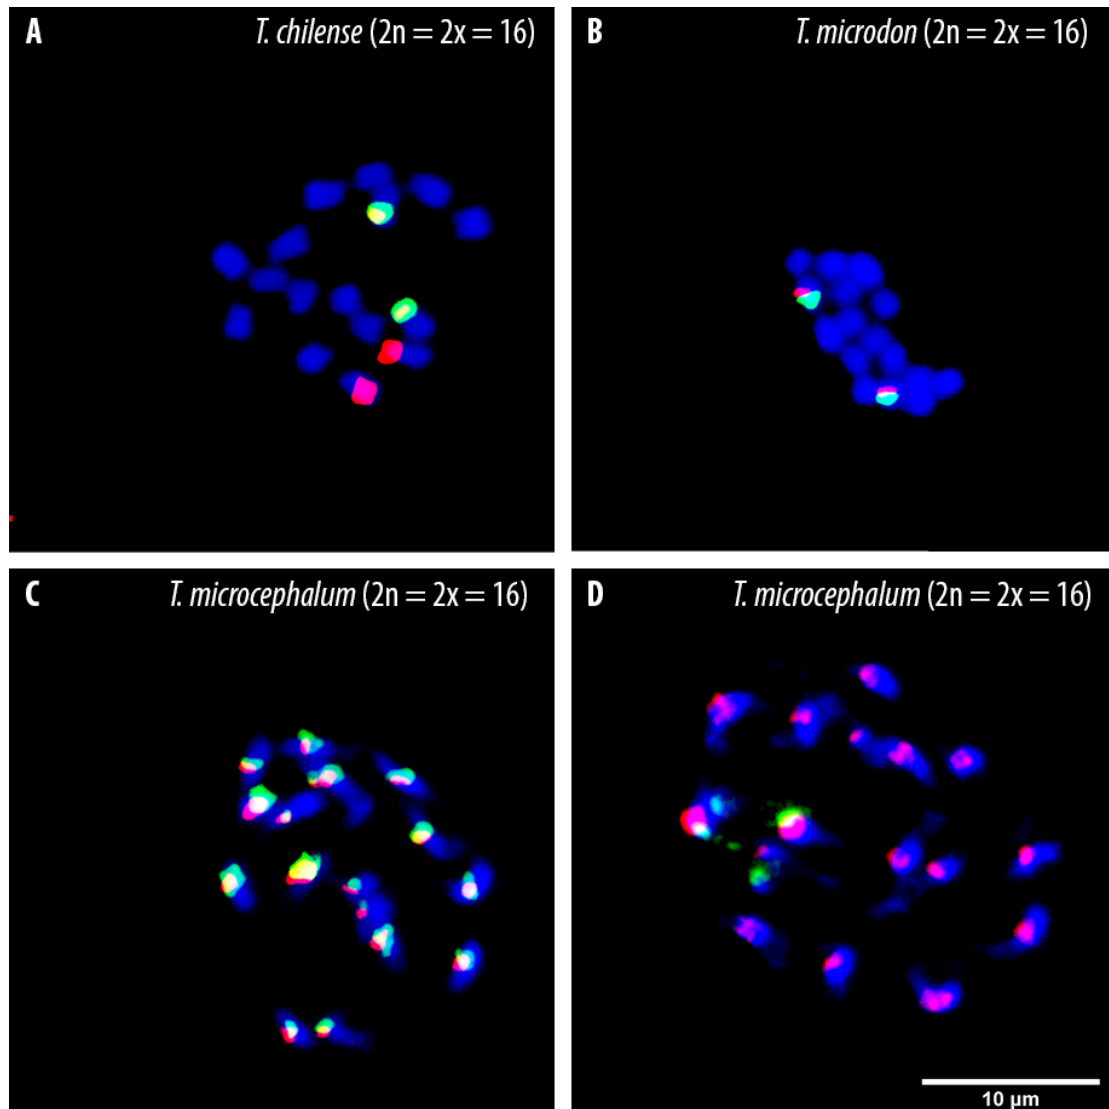

**Figure S5.** Hybridization patterns of 5S and 26S rDNA FISH probes in section *Involucrarium*.

Supplement: s1 [file s1]
